# Supplementary material for: 18F-FDG PET/CT versus Diagnostic Contrast-Enhanced CT for Follow-Up of Stage IV Melanoma Patients Treated by Immune Checkpoint Inhibitors: Frequency and Management of Discordances over a 3-Year Period in a University Hospital
Source: MDPI journal article supplement (doi:10.3390/diagnostics11071198), 2021-07-01
Supplement: s1 [file s1]

**Table S1.** Impact of histoprognostic characteristics on the occurrence of discordance between ceCT Vs <sup>18</sup>F-FDG PET/CT for treatment response classification

|                              |                 | <6 months                               |                | 6 to 10 months                          |                | 10 to 16 months                         |                | >16 months                              |                |
|------------------------------|-----------------|-----------------------------------------|----------------|-----------------------------------------|----------------|-----------------------------------------|----------------|-----------------------------------------|----------------|
|                              | Variables       | Numbers of observation/<br>discordances | <i>p</i> value |
| <b>Location</b>              | Head/Neck/Trunk |                                         |                |                                         |                |                                         |                |                                         |                |
|                              | Lower limbs     | 55 / 18                                 | 0.500          | 56 / 20                                 | 0.600          | 48 / 13                                 | 0.970          | 34 / 15                                 | 0.688          |
|                              | Upper limbs     |                                         |                |                                         |                |                                         |                |                                         |                |
|                              | Others          |                                         |                |                                         |                |                                         |                |                                         |                |
| <b>Clinical stage</b>        | I/II            | 42 / 14                                 | 1.000          | 40 / 12                                 | 0.720          | 34 / 7                                  | 1.000          | 22 / 8                                  | 0.649          |
|                              | III/IV          |                                         |                |                                         |                |                                         |                |                                         |                |
| <b>Histological subtypes</b> | NMM             |                                         |                |                                         |                |                                         |                |                                         |                |
|                              | SSM             | 47 / 15                                 | 0.499          | 48 / 16                                 | 0.592          | 48 / 13                                 | 0.727          | 30 / 13                                 | 0.318          |
|                              | Others          |                                         |                |                                         |                |                                         |                |                                         |                |
| <b>BRAF status</b>           | Mutated         | 55 / 18                                 | 0.394          | 56 / 20                                 | 0.762          | 41 / 9                                  | 0.360          | 34 / 15                                 | 0.715          |
|                              | Non-mutated     |                                         |                |                                         |                |                                         |                |                                         |                |
| <b>Breslow</b>               | ≤1mm            | 38 / 12                                 | 1.000          | 37 / 12                                 | 0.659          | 33 / 9                                  | 1.000          | 22 / 11                                 | 0.611          |
|                              | >1mm            |                                         |                |                                         |                |                                         |                |                                         |                |
| <b>Ulceration</b>            | Yes             | 33 / 11                                 | 0.721          | 31 / 8                                  | 1.000          | 27 / 7                                  | 1.000          | 17 / 8                                  | 0.347          |
|                              | No              |                                         |                |                                         |                |                                         |                |                                         |                |
| <b>Regression</b>            | Yes             | 31 / 10                                 | 0.967          | 27 / 7                                  | 1.000          | 25 / 6                                  | 1.000          | 16 / 8                                  | 0.200          |
|                              | No              |                                         |                |                                         |                |                                         |                |                                         |                |
